1 **Title**

2 Panpulmonate transcriptomes reveal candidate genes involved in the adaptation to freshwater and  
3 terrestrial habitats in gastropods

4 **Authors' names and affiliations**

5 Pedro E. Romero<sup>1,2</sup>

6 [pedro.romero@senckenberg.de](mailto:pedro.romero@senckenberg.de)

7 1 Senckenberg Biodiversity and Climate Research Centre (BiK-F), Senckenberganlage 25, 60325  
8 Frankfurt am Main, Germany.

9 2 Institute for Ecology, Evolution & Diversity, Faculty of Biological Sciences, Goethe University  
10 Frankfurt, Max-von-Laue-Straße 13, 60438 Frankfurt am Main, Germany.

11

12 Barbara Feldmeyer<sup>1</sup>

13 [bfeldmeyer@senckenberg.de](mailto:bfeldmeyer@senckenberg.de)

14 1 Senckenberg Biodiversity and Climate Research Centre (BiK-F), Senckenberganlage 25, 60325  
15 Frankfurt am Main, Germany.

16

17 Markus Pfenninger<sup>1,2</sup>

18 [pfenninger@bio.uni-frankfurt.de](mailto:pfenninger@bio.uni-frankfurt.de)

19 1 Senckenberg Biodiversity and Climate Research Centre (BiK-F), Senckenberganlage 25, 60325  
20 Frankfurt am Main, Germany.

21 2 Institute for Ecology, Evolution & Diversity, Faculty of Biological Sciences, Goethe University  
22 Frankfurt, Max-von-Laue-Straße 13, 60438 Frankfurt am Main, Germany.

23

24

25

26

27

28

29 **Corresponding author**

30 Pedro E. Romero <sup>1,2</sup>

31 [pedro.romero@senckenberg.de](mailto:pedro.romero@senckenberg.de)

32 1 Senckenberg Biodiversity and Climate Research Centre (BiK-F), Senckenberganlage 25, 60325

33 Frankfurt am Main, Germany

34 2 Institute for Ecology, Evolution & Diversity, Faculty of Biological Sciences, Goethe University

35 Frankfurt, Max-von-Laue-Straße 13, 60438 Frankfurt am Main, Germany.

36

37

38

39

40

41

42

43

44

45

46

47

48

49

50

51

52

53

54

55

56

57 **Abstract**

58 **Background**

59 The conquest of the land from aquatic habitats is a fascinating evolutionary event that happened  
60 multiple times in different phyla. Mollusks are among the organisms that successfully invaded the  
61 non-marine realm, resulting in the radiation of terrestrial panpulmonate gastropods. We compared  
62 transcriptomes from panpulmonates to study the selective pressures that modeled the transitions  
63 from marine into freshwater and terrestrial realms in this molluscan lineage.

64

65 **Results**

66 *De novo* assembly of six panpulmonate transcriptomes resulted in 55,000 - 97,000 predicted open  
67 reading frames, of which 9 - 14% were functionally annotated. Adding published transcriptomes, we  
68 predicted 791 ortholog clusters shared among fifteen panpulmonate species, resulting in 702 amino  
69 acid and 736 codon-wise alignments. The branch-site test of positive selection applied to the codon-  
70 wise alignments showed twenty-eight genes under positive selection in the freshwater lineages and  
71 seven in the terrestrial lineages. Gene ontology categories of these candidate genes include actin  
72 assembly, transport of glucose, and the tyrosine metabolism in the terrestrial lineages; and, DNA  
73 repair, metabolism of xenobiotics, mitochondrial electron transport, and ribosome biogenesis in the  
74 freshwater lineages.

75

76 **Conclusions**

77 We identified candidate genes representing processes that may have played a key role during the  
78 water-to-land transition in Panpulmonata. These genes were involved in energy metabolism and  
79 gas-exchange surface development in the terrestrial lineages and in the response to the abiotic  
80 stress factors (UV radiation, osmotic pressure, xenobiotics) in the freshwater lineages. Our study  
81 expands the knowledge of possible adaptive signatures in genes and metabolic pathways related to  
82 the invasion of non-marine habitats in invertebrates.

83

84

85 **Keywords**

86 Realm transition, Phylogenomics, Panpulmonata, Positive selection.

87

88 **Background**

89 The invasion from marine to non-marine habitats is one of the most enthralling events in the  
90 evolution of life on Earth. The transition from sea to freshwater and land environments occurred  
91 multiple times in different branches of the tree of life. Mollusks, along arthropods and vertebrates,  
92 are among the successful phyla that invaded the non-marine realm. Several branches from the  
93 molluscan class Gastropoda (Neritimorpha, Cyclophoroidea, Littorinoidea, Rissosoidea, and  
94 Panpulmonata) have colonized terrestrial habitats multiple times [1, 2]. Especially, several  
95 independent land invasions in the Panpulmonata resulted in a significant adaptive radiation and  
96 explosive diversification that likely originated up to a third of the extant molluscan diversity [3].  
97 Therefore, panpulmonate lineages are a promising system to study evolution of adaptations to non-  
98 marine habitats.

99

100 The habitat transition must have triggered several novel adaptations in behavior, breathing,  
101 excretion, locomotion, and osmotic and temperature regulation, to overcome problems that did not  
102 exist in the oceans such as dehydration, lack of buoyancy force, extreme temperature fluctuations  
103 and radiation damage [4-6]. Studies in vertebrates showed different genomic changes involved in  
104 the adaptation to the new habitats. Mudskippers, amphibious teleost fishes adapted to live on  
105 mudflats, possess unique immune genes to possibly counteract novel pathogens on land, and opsin  
106 genes for aerial vision and for enhancement of color vision [7]. Tetrapods showed adaptation  
107 signatures in the carbamoyl phosphate synthase I (CPS1) gene involved in the efficient production  
108 of hepatic urea [8]. Primitive sarcopterygians like the coelacanth *Latimeria* already possess various  
109 conserved non-coding elements (CNE) that enhance the development of limbs, and an expanded  
110 repertoire of genes related to the pheromone receptor VR1 that may have facilitated the adaptation  
111 to sense airborne chemicals during the water-to-land transition in tetrapods [9]. Also, vertebrate

112 keratin genes responsible for skin rigidity underwent a functional diversification after the water-to-  
113 land transition, enhancing the protection against friction imposed by the new terrestrial lifestyle [10].

114

115 Conversely, information about the molecular basis of adaptation from marine to non-marine habitats  
116 in invertebrates is still scarce. Only one study reported adaptive signals in gene families (e. g.  
117 ATPases, DNA repair, and ribosomal proteins) that may have played a key role during  
118 terrestrialization in springtails and insects (Hexapoda) [11], clades that probably had a common  
119 pancrustacean ancestor living in a shallow marine environment [12, 13]. Mutations in the ATPases  
120 were suggested to provide the necessary energy to adapt to new high-energy demanding habitats  
121 [14], DNA repair genes would have helped reducing the damage produced by increased ultraviolet  
122 (UV) irradiation, and finally, as the ribosomal machinery is salt-sensitive, adaptive signs in the  
123 ribosomal proteins could have been a result of the different osmotic pressures within aquatic and  
124 terrestrial environments [15].

125

126 In a previous paper, we explored the adaptive signals in the mitochondrial genomes of  
127 panpulmonates [16]. We found that in the branches leading to lineages with terrestrial taxa  
128 (Ellobioidea and Stylommatophora), the mitochondrial genes *cob* and *nad5*, both involved in the  
129 oxidative phosphorylation pathway that finally produces ATP, appeared under positive selection.  
130 Moreover, the amino acid positions under selection have been related to an increased energy  
131 production probably linked to novel demands of locomotion [17, 18], and to changes in the  
132 equilibrium constant physicochemical property involved in the regulation of ROS production and  
133 thus, in the ability to tolerate new abiotic stress conditions [19].

134

135 Here, we expanded our search for candidate genes related to the adaptation to non-marine  
136 habitats, using transcriptome-wide data from several panpulmonate taxa, including marine,  
137 intertidal, freshwater and terrestrial lineages. We used a phylogenomic approach to reconstruct the  
138 evolutionary relationships of Panpulmonata and then tested for positive selection in the branches

139 leading to freshwater and land snails. This approach aims to provide new insights into the selective  
140 pressures shaping the transition from marine to freshwater and land lifestyles.

141

## 142 **Results**

143 We generated approximately 2,100,000 - 3,400,000 Illumina for our six samples (five ellobiids and  
144 one stylommatophoran species, Table 1). The quality trimming eliminated 14 - 39% of short and low-  
145 quality fragments in our samples. *De novo* meta assembly with MIRA produced approximately  
146 55,000 - 98,000 transcripts in our samples and 54,000 - 130,000 in the other additional samples  
147 (Table 1). For further analyses we used transcripts larger than 300 bp. This represented a reduction  
148 of less than 1% in our samples but a higher reduction in the public data (3 - 35%). The number of  
149 predicted open reading frames was very similar to the number of transcripts > 300 bp in almost all  
150 cases, the only exception was *Radix balthica*, where only 57% of the transcripts obtained an ORF  
151 prediction. We obtained 9,000 - 30,000 single blast hits for our data, representing 5,000 - 13,000  
152 single annotated genes. The percentage of annotated genes from our open reading frame data was  
153 9 - 14%.

154

155 We predicted 791 orthologous clusters shared among all species, of which 702 ortholog clusters  
156 remained after removing spurious and poorly amino acid aligned sequences in trimAL. From this  
157 dataset, MARE selected 382 informative clusters to reconstruct the phylogeny of the panpulmonate  
158 species (Additional File 1). The amount of missing data corresponds to 10.94% in the complete  
159 matrix, and 6.26% in the reduced matrix (Additional Files 2 and 3, respectively).

160

161 Most branches in the panpulmonate tree received high support (Figure 1). The clade containing  
162 Stylommatophora and Systellommatophora was significantly supported (bootstrap: 94 / posterior  
163 probability: 1.0) and appeared as a sister of the monophyletic Ellobioidea (99/1.0). The Acochlidia  
164 clade was moderately supported (86/1.0). The association of the Acochlidia with the Ellobioidea,  
165 Stylommatophora, Systellommatophora clade had no significant bootstrap support but a high

166 posterior probability (64/1.0). The Hygrophila clade was highly supported (100/1.0). The association  
167 of Amphiboloidea and Pyramidelloidea was also highly supported (100/1.0).

168

169 We detected selection signatures on genes (codon-wise alignments) across the freshwater and  
170 terrestrial lineages in Panpulmonata. The likelihood-ratio test (LRT) comparing the branch-site  
171 model A against the null model (neutral) showed seven orthologous clusters under positive  
172 selection in the land lineages and twenty-eight clusters in the freshwater lineages (Additional File 4).  
173 There was no overlapping within positively selected genes from freshwater and terrestrial lineages.  
174 Table 2 shows examples of these candidate genes, their annotations, biological processes,  
175 molecular functions, and pathways involved. The BlastX annotations revealed candidate genes  
176 involved in the actin assembly, protein folding, transport of glucose, and vesicle transport in the  
177 terrestrial lineages. In the freshwater lineages, we found candidate genes associated to DNA repair,  
178 metabolism of xenobiotics, mitochondrial electron transport, protein folding, proteolysis, ribosome  
179 biogenesis, RNA processing and transport of lipids (Additional Files 5 and 6). We found no  
180 significant enriched GO (Gene ontology) terms neither in the freshwater nor terrestrial lineages.

181

182 Candidate genes under positive selection in the terrestrial lineages were involved in the  
183 carbohydrate digestion, endocytosis, focal adhesion, and the metabolism of lipids and tyrosine  
184 pathways. In case of the freshwater lineages, the candidate genes were involved in several  
185 metabolic pathways, for example, amino acid biosynthesis, focal adhesion, lysosome, oxidative  
186 phosphorylation, and protein signaling (Table 2, Additional Files 5 and 6).

187

## 188 **Discussion**

189 Panpulmonates transitioned from marine to freshwater and terrestrial environments in several  
190 lineages and multiple times [20, 2, 21], Thus, they are a very suitable model to study the invasion of  
191 non-marine realms. However, the phylogenetic relationships within this clade are yet to be resolved  
192 [20]. Our tree topology using 382 orthologous clusters resembles the one obtained from Jörger et al.  
193 [21], based on mitochondrial and nuclear markers. In addition, we found support for the Geophila:

194 Stylommatophora (terrestrial) and Systellommatophora (intertidal/terrestrial) as sister groups. This  
195 clade has been proposed before based on the position of the eyes at the tip of cephalic tentacles  
196 [22]. Still, previous phylogenies using mitochondrial and nuclear markers failed to support this clade  
197 [23, 16, 24, 21]. We also found support for Eupulmonata (*sensu* Morton [25, 23]), a clade  
198 comprising Stylommatophora and Systellommatophora plus Ellobioidea (intertidal/terrestrial) [20],  
199 this clade was supported using a combination of mitochondrial and nuclear markers [21].

200 Generation of high-quality transcriptomic data for other panpulmonate clades (marine Sacoglossa  
201 and Siphonarioidea, freshwater Glacidorboidea), and additional data for terrestrial Stylommatophora  
202 and Systellommatophora, will definitively illuminate the evolutionary relationships in Panpulmonata.

203

204 Our study is the first genome-wide report on the molecular basis of adaptation to non-marine  
205 habitats in panpulmonate gastropods. In case of the terrestrial lineages, we found evidence that the  
206 different positively selected genes are involved in a general pattern of adaptation to increased  
207 energy demands. The adaptive signs found in a gene related to actin assembly (OG0001172, Table  
208 2) can be related to the necessity to move (forage, hunt preys or escape from predators) in the  
209 terrestrial realms. Moreover, the displacement in an environment lacking the buoyancy force to float  
210 or swim requires more energy, which can be obtained by increasing the glucose uptake  
211 (OG0000137) to produce energy in form of ATP. The adaptive signatures we found previously in  
212 two mitochondrial genes, *cob* and *nad5*, involved in energy production in the mitochondrion, also  
213 suggested a response to new metabolic requirements in the terrestrial realm, such as the increase  
214 of energy demands (to move and sustain the body mass).

215

216 One gene found under positive selection in the terrestrial genus *Pythia*, was involved in the  
217 metabolism of tyrosine (OG0000060). Tyrosine is the principal component of the thyroid hormones  
218 (TH). Despite invertebrates lack the thyroid gland responsible of the production of TH's; the  
219 synthesis of TH's has been demonstrated in mollusks and echinoderms. In these organisms, iodine  
220 is ligated to the tyrosine in the peroxisomes, producing thyroid hormones [26]. Notably, it has been  
221 suggested that iodinated tyrosine may have been essential in vertebrates during the transition to



222 terrestrial habitats for TH's are required in the expression of transcription factors involved in the  
223 embryonic development and differentiation of the lungs [27]. Land snails adapted to breath air by  
224 losing their gills and transforming the inner surface of their mantle into a lung [5]. Therefore, we  
225 propose that the tyrosine pathway was also a key component in invertebrates probably promoting  
226 the development of novel gas exchange tissues in land snails.

227

228 In case of the freshwater lineages, one of the positively selected genes was similar to the subunit 4  
229 of the cytochrome c oxidase (*cob*) respiratory complex (OG0004174, Table 2). As mentioned above,  
230 *cob* is part of the energy production pathway in the cell. This enzyme complex contains many  
231 subunits encoded both in the mitochondrial and nuclear genome. The subunit 4 belongs to the  
232 nuclear genome and has an essential role in the assembly and function of the *cob* complex [28]. In  
233 agreement with our previous results that found the mitochondrial *cob* subunit under positive  
234 selection [16], we suggest that this gene was also involved in enhancing the metabolic performance  
235 of the enzyme and aided to cope with the new energy demands the realm transition.

236

237 A gene similar to cytochrome P450 was also found under positive selection (OG000120).

238 Cytochrome P450s are proteins involved in the metabolism of xenobiotics. They were also under  
239 positive selection in the terrestrial Hexapoda lineages in comparison to other water-dwelling  
240 arthropods [11]. This result suggests that adaptations in these genes probably improve the  
241 response to new organic pollutants and toxins absent in the marine realm.

242

243 Another gene that showed adaptive signatures was the 40S ribosomal protein S3a (OG0002708).  
244 Likewise, ribosomal genes were also identified in a previous study on land-to-water transitions in  
245 hexapods [11] and plants [15]. In the latter study, it was suggested that the difference in the osmotic  
246 pressure from aquatic and terrestrial realms could affect the salt-sensitive ribosomal machinery,  
247 triggering adaptations to tolerate new salt conditions. This could also be the case for the freshwater  
248 animals (hypertonic) in comparison to the marine ones (hypotonic).

249

250 Finally, we found adaptive signatures in a DNA methyltransferase gene (OG0004116). This enzyme  
251 is part of the DNA repair system in the cell. Specifically, it removes methyl groups from O6-  
252 methylguanine produced by carcinogenic agents and it has been showed that its expression is  
253 regulated by the presence of ultraviolet B (UVB) radiation [29]. Positive selection on DNA repair  
254 genes has been found in hexapods [11], and in vertebrates living in high altitude environments  
255 (Tibetan antelopes) [14] or in mudflats (mudskippers) [7], suggesting an important role in the  
256 maintenance of the genomic integrity in response to the rise of temperature gradients or UV  
257 radiation in the terrestrial realms. In case of the aquatic environments, an extensive review has  
258 found an overall negative UVB effect on marine and freshwater animals [30]. However, the authors  
259 did not find a significant difference of the survival among taxonomic groups or levels of exposure in  
260 marine and freshwater realms, and suggested that the negative effects are highly variable among  
261 organisms and depends on several factors including cloudiness, ozone concentration, seasonality,  
262 topography, and behavior. Interestingly, it has been reported that survival in the freshwater snail  
263 *Physella acuta* (Hygrophila) depends of the combination of a photoenzymatic repair system plus  
264 photoprotection provided by the shell thickness and active selection of locations below the water  
265 surface avoiding the sunlight [31]

266

## 267 **Conclusions**

268 We found that the positively selected genes in the terrestrial lineages were related to motility and to  
269 the development of novel gas-exchange tissues; while most of the genes in freshwater lineages  
270 were related to the response to abiotic stress such osmotic pressure, UV radiation and xenobiotics.  
271 These adaptations at the genomic level combined with novel responses in development and  
272 behavior probably facilitated the success during the transitions to the non-marine realm. Our results  
273 are very promising to understand the genomic basis of the adaptation during the sea-to-land  
274 transitions, and also highlight the necessity of more genome-wide studies especially in  
275 invertebrates, comparing marine, freshwater and terrestrial taxa, to unravel the evolution of the  
276 molecular pathways involved in the invasion of new realms.

277

## 278 **Methods**

### 279 **Dataset collection**

280 The dataset from Zapata et al. [32] was used as a starting point for our study. We added to this  
281 dataset the transcriptome from *Radix balthica* [33] and retrieved additional freshwater specimens  
282 from the NCBI Sequence Read Archive (SRA) (<http://www.ncbi.nlm.nih.gov/sra>). We complemented  
283 the dataset with five intertidal and terrestrial specimens from Ellobioidea (*Carychium* sp., *Cassidula*  
284 *plecotremata*, *Melampus flavus*, *Pythia pachyodon*, *Trimusculus* sp.) and one terrestrial  
285 Stylommatophora (*Arion vulgaris*), collected in Japan (2013) and Germany (2014), respectively  
286 (Additional File 7). RNA was isolated following the RNeasy kit (QIAGEN) following the  
287 manufacturer's protocol. cDNA production and sequencing on the Illumina NextSeq500 platform  
288 (150 bp paired- end reads) was performed by StarSEQ GmbH (Mainz, Germany), according to their  
289 Illumina standard protocol. The final dataset comprised fifteen transcriptomes of panpulmonate  
290 species occurring in marine, intertidal, freshwater and terrestrial habitats (Table 1).

291

### 292 **Read processing and quality checking**

293 FastQC [34] was used for initial assessment of reads quality. Then, Trimmomatic v0.33 [35] was  
294 used to remove and trim Illumina adaptor sequences and other reads with an average quality below  
295 15 within a 4-base wide sliding window. In addition, we repeated the trimming analysis specifying a  
296 minimum length of 25 nt for further assembly comparisons. The same procedure was applied to all  
297 samples, except for *Radix* (454 reads). In this latter case, we got the transcriptome assembly  
298 directly from the author [33].

299

### 300 **Transcriptome assembly**

301 *De novo* assembly was performed for all samples, except *Radix* (see last section), using Trinity  
302 v2.0.6 [36] with a minimum contig length of 100 amino acids, and Bridger v2014-12-01 [37] with  
303 default options. Bridger required the trimmed set with the minimum length of 25 nt. We combined  
304 the results from Trinity and Bridger in a meta-assembly using MIRA [38] with default settings. Only  
305 sequences with longer than 100 aa were retained for further analyses. This step was done to

306 improve the accuracy in ortholog determination and facilitate phylogenomic analyses [39].  
307 Furthermore, we used the ORFpredictor server [40] to predict open reading frames (ORF) within the  
308 transcripts.

309

### 310 **Construction of ortholog clusters**

311 Ortholog clusters shared among protein sequences of the fifteen panpulmonate species were  
312 predicted using OrthoFinder [41] with default parameters. In case clusters contained more than one  
313 sequence per species, only a single sequence per species with the highest average similarity was  
314 selected using a homemade script. The predicted amino acid sequences from each ortholog cluster  
315 were aligned using MAFFT [42] with standard parameters. Nucleotide sequences in each  
316 orthogroup were aligned codon-wise using TranslatorX [43] taking into account the information from  
317 the amino acid alignments. Ambiguous aligned regions from the amino acid or codon alignments  
318 were removed using Gblocks [44] with standard settings. We used TrimAL [45] to remove poorly  
319 aligned or incomplete sequences in each ortholog cluster, using a minimum residue overlap score  
320 of 0.75.

321

### 322 **Phylogenomic analyses**

323 Phylogenetic relationships among the Panpulmonata were reconstructed based on a subset of 382  
324 ortholog clusters. The subset selection was done using MARE [46], a tool designed to find  
325 informative subsets of genes and taxa within a large phylogenetic dataset of amino acid sequences.  
326 The concatenated amino acid alignment length resulted in 88622 positions. Data were partitioned  
327 by gene using the partition scheme suggested in PartitionFinder [47] using the *-rcluster* option  
328 (relaxed hierarchical clustering algorithm), suitable for phylogenomic data [48]. We reconstructed an  
329 unrooted tree to be used as an input for the selection analyses. Maximum likelihood analyses were  
330 conducted in RAxML-HPC2 (8.0.9) [49]. We followed the “hard and slow way” suggestions indicated  
331 in the manual and selected the best-likelihood tree after 1000 independent runs. Then, branch  
332 support was evaluated using bootstrapping with 100 replicates, and confidence values were drawn  
333 in the best-scoring tree. Bayesian inference was conducted in MrBayes v3.2.2 [50]. Four

334 simultaneous Monte Carlo Markov Chains (MCMC) were run, with the following parameters: eight  
335 chains of 20 million generations each, sampling every 20000 generations and a burn-in of 25%.  
336 Tracer 1.6 [51] was used to evaluate effective sample sizes ( $ESS > 200$ ). We assume that a  
337 bootstrap value of  $>70\%$  and a posterior probability of  $> 0.95$  are evidence of significant nodal  
338 support.

339

### 340 **Selection analyses**

341 The test of positive selection was performed for 736 ortholog clusters (codon-wise alignments) in  
342 CODEML implemented in the software PAML v4.8 [52]. PAML estimated the omega ratio ( $\omega = dN:$   
343 non-synonymous sites /  $dS$ : synonymous sites);  $\omega = 1$  indicates neutral evolution,  $\omega < 1$  purifying  
344 selection, and  $\omega > 1$  indicates positive selection [53]. To detect positive selection affecting sites  
345 along the terrestrial or freshwater branches (foreground) in comparison to the intertidal or marine  
346 lineages (background), the branch-site model A [54] in CODEML was applied (model = 2, NSsites =  
347 2) for each orthologous cluster. The unrooted tree obtained using maximum likelihood was set as  
348 the guide tree. In order to avoid problems in convergence in the log-likelihood calculations, we ran  
349 three replicates of model A with different initial omega values ( $\omega = 0.5$ ,  $\omega = 1.0$ ,  $\omega = 5.0$ ). We also  
350 calculated the likelihood of the null model (model = 2, NSsites = 2, fixed  $\omega = 1.0$ ). Both models were  
351 compared in a likelihood ratio test ( $LRT = 2 * (\ln L \text{ model A} - \ln L \text{ null model})$ ). The Bayes Empirical  
352 Bayes (BEB) algorithm implemented in CODEML was used to calculate posterior probabilities of  
353 positive selected sites. We corrected p-values with a false discovery rate (FDR) cut-off value of 0.05  
354 using the Benjamini and Hochberg method [55] implemented in R. The statistical significance of the  
355 overlap between positively selected genes from freshwater and terrestrial lineages was calculated  
356 using the R function *phyper*.

357

### 358 **Functional annotation**

359 The transcripts were annotated using BlastX [56]. We blasted the nucleotide sequences against the  
360 invertebrate protein sequence RefSeq database (release 73, November 2015), with an e-value cut-  
361 off of  $10^{-6}$ . We selected top hits with the best alignment and the lowest e-value. Gene ontology (GO)

362 terms for each BLASTx search were obtained in the Blast2GO suite [57]. Functional annotation  
363 information was obtained from InterPro database [58] using the InterProScan [59]. GO terms were  
364 then assigned to each orthologous group that was found under positive selection. In addition, we  
365 added to this clusters the metabolic pathway information retrieved from the KAAS server [60]. This  
366 server assigns orthology identifiers from the KEGG database (Kyoto Encyclopedia of Genes and  
367 Genomes). Functional enrichment analysis using the Fisher exact test was also performed in  
368 Blast2GO comparing the genes under positive selection against all ortholog clusters.

369

## 370 **Declarations**

### 371 **Ethics approval and consent to participate**

372 Not applicable.

### 373 **Consent to publish**

374 Not applicable.

### 375 **Availability of data and materials**

376 Raw sequence data is deposited in the Sequence Read Archive as BioProject (PRJNA339817), in  
377 the NCBI database. All other data sets (including trees, alignments, orthologous clusters, and  
378 scripts) supporting the results are available in the FigShare database: <https://dx.doi.org/>.

### 379 **Competing interests**

380 The authors declare that they have no competing interests.

### 381 **Funding**

382 The project was supported by the German funding program “LOEWE – Landes-Offensive zur  
383 Entwicklung Wissenschaftlich-ökonomischer Exzellenz” of the Hessen State Ministry of Higher  
384 Education, Research and the Arts. PER also received a scholarship from  
385 CONCYTEC/CIENCIACTIVA: Programa de becas de doctorado en el extranjero del Gobierno del  
386 Perú (291-2014-FONDECYT).

### 387 **Author’s contributions**

388 PER carried out the fieldwork, transcriptome assembly, phylogenetic and molecular evolution  
389 analyses, conceived the study and wrote the manuscript. BF participated in the transcriptome

390 assemblies and molecular evolution analyses, and helped to draft the manuscript. MP participated  
391 in the design and coordination of the study and revised the manuscript. All authors read and  
392 approved the final manuscript.

### 393 **Acknowledgements**

394 We thank Yasunori Kano and Annette Klussmann-Kolb for their assistance in the fieldwork and  
395 Tilman Schell for his assistance in the bioinformatics analyses.

396

### 397 **References**

- 398 1. Kameda Y, Kato M. Terrestrial invasion of pomatiopsid gastropods in the heavy-snow region of the  
399 Japanese Archipelago. *BMC Evol Biol.* 2011;11:118. doi:10.1186/1471-2148-11-118.
- 400 2. Romero PE, Pfenninger M, Kano Y, Klussmann-Kolb A. Molecular phylogeny of the Ellobiidae (Gastropoda:  
401 Panpulmonata) supports independent terrestrial invasions. *Mol Phylogenet Evol.* 2016;97:43-54.  
402 doi:10.1016/j.ympev.2015.12.014.
- 403 3. Kocot KM, Halanych KM, Krug PJ. Phylogenomics supports Panpulmonata: opisthobranch paraphyly and  
404 key evolutionary steps in a major radiation of gastropod molluscs. *Mol Phylogenet Evol.* 2013;69(3):764-71.  
405 doi:10.1016/j.ympev.2013.07.001.
- 406 4. Little C. *The terrestrial invasion: An ecophysiological approach to the origins of land animals.* Cambridge:  
407 Cambridge University Press; 1990.
- 408 5. Laurin M. *How vertebrates left water.* Berkeley: University of California Press; 2010.
- 409 6. McGhee G. *When the invasion of land failed: The legacy of the Devonian extinctions.* New York: Columbia  
410 University Press; 2013.
- 411 7. You X, Bian C, Zan Q, Xu X, Liu X, Chen J et al. Mudskipper genomes provide insights into the terrestrial  
412 adaptation of amphibious fishes. *Nat Commun.* 2014;5:5594. doi:10.1038/ncomms6594.
- 413 8. Amemiya CT, Alföldi J, Lee AP, Fan S, Philippe H, Maccallum I et al. The African coelacanth genome  
414 provides insights into tetrapod evolution. *Nature.* 2013;496(7445):311-6. doi:10.1038/nature12027.
- 415 9. Nikaido M, Noguchi H, Nishihara H, Toyoda A, Suzuki Y, Kajitani R et al. Coelacanth genomes reveal  
416 signatures for evolutionary transition from water to land. *Genome Res.* 2013;23(10):1740-8.  
417 doi:10.1101/gr.158105.113.
- 418 10. Vandebergh W, Bossuyt F. Radiation and functional diversification of alpha keratins during early  
419 vertebrate evolution. *Mol Biol Evol.* 2012;29(3):995-1004. doi:10.1093/molbev/msr269.
- 420 11. Faddeeva A, Studer RA, Kraaijeveld K, Sie D, Ylstra B, Marien J et al. Collembolan transcriptomes highlight  
421 molecular evolution of hexapods and provide clues on the adaptation to terrestrial life. *PLoS One.*  
422 2015;10(6):e0130600. doi:10.1371/journal.pone.0130600.

- 423 12. Misof B, Liu S, Meusemann K, Peters RS, Donath A, Mayer C et al. Phylogenomics resolves the timing and  
424 pattern of insect evolution. *Science*. 2014;346(6210):763-7. doi:10.1126/science.1257570.
- 425 13. von Reumont BM, Jenner RA, Wills MA, Dell'ampio E, Pass G, Ebersberger I et al. Pancrustacean  
426 phylogeny in the light of new phylogenomic data: support for Remipedia as the possible sister group of  
427 Hexapoda. *Mol Biol Evol*. 2012;29(3):1031-45. doi:10.1093/molbev/msr270.
- 428 14. Ge RL, Cai Q, Shen YY, San A, Ma L, Zhang Y et al. Draft genome sequence of the Tibetan antelope. *Nat*  
429 *Commun*. 2013;4:1858. doi:10.1038/ncomms2860.
- 430 15. Wissler L, Codoner FM, Gu J, Reusch TB, Olsen JL, Procaccini G et al. Back to the sea twice: identifying  
431 candidate plant genes for molecular evolution to marine life. *BMC Evol Biol*. 2011;11:8. doi:10.1186/1471-  
432 2148-11-8.
- 433 16. Romero PE, Weigand AM, Pfenninger M. Positive selection on panpulmonate mitogenomes provide new  
434 clues on adaptations to terrestrial life. *BMC Evol Biol*. 2016;16(1):164. doi:10.1186/s12862-016-0735-8.
- 435 17. Shen YY, Liang L, Zhu ZH, Zhou WP, Irwin DM, Zhang YP. Adaptive evolution of energy metabolism genes  
436 and the origin of flight in bats. *Proc Natl Acad Sci U S A*. 2010;107(19):8666-71.  
437 doi:10.1073/pnas.0912613107.
- 438 18. McClellan DA, Palfreyman EJ, Smith MJ, Moss JL, Christensen RG, Sailsbery JK. Physicochemical evolution  
439 and molecular adaptation of the cetacean and artiodactyl cytochrome b proteins. *Mol Biol Evol*.  
440 2005;22(3):437-55. doi:10.1093/molbev/msi028.
- 441 19. Mittler R. Oxidative stress, antioxidants and stress tolerance. *Trends Plant Sci*. 2002;7(9):405-10.
- 442 20. Schrödl M. Time to say "Bye-bye Pulmonata"? *Spixiana*. 2014;37(2):161-4.
- 443 21. Jorger KM, Stöger I, Kano Y, Fukuda H, Kneibelsberger T, Schrödl M. On the origin of Acochlidia and other  
444 enigmatic euthyneuran gastropods, with implications for the systematics of Heterobranchia. *BMC Evol Biol*.  
445 2010;10:323. doi:10.1186/1471-2148-10-323.
- 446 22. Dayrat B, Tillier S. Evolutionary relationships of euthyneuran gastropods (Mollusca): a cladistic re-  
447 evaluation of morphological characters. *Zoological Journal of the Linnean Society*. 2002;135(4):403-70.  
448 doi:10.1046/j.1096-3642.2002.00018.x.
- 449 23. White TR, Conrad MM, Tseng R, Balayan S, Golding R, de Frias Martins AM et al. Ten new complete  
450 mitochondrial genomes of pulmonates (Mollusca: Gastropoda) and their impact on phylogenetic  
451 relationships. *BMC Evol Biol*. 2011;11:295. doi:10.1186/1471-2148-11-295.
- 452 24. Dayrat B, Conrad M, Balayan S, White TR, Albrecht C, Golding R et al. Phylogenetic relationships and  
453 evolution of pulmonate gastropods (Mollusca): New insights from increased taxon sampling. *Mol Phylogenet*  
454 *Evol*. 2011;59(2):425-37. doi:10.1016/j.ympev.2011.02.014.
- 455 25. Morton JE. The evolution of the Ellobiidae with a discussion on the origin of the Pulmonata. *Proceedings*  
456 *of the Zoological Society of London*. 1955;125(1):127-68. doi:10.1111/j.1096-3642.1955.tb00596.x.



- 457 26. Heyland A, Price DA, Bodnarova-Buganova M, Moroz LL. Thyroid hormone metabolism and peroxidase  
458 function in two non-chordate animals. *J Exp Zool B Mol Dev Evol.* 2006;306(6):551-66.  
459 doi:10.1002/jez.b.21113.
- 460 27. Crockford SJ. Evolutionary roots of iodine and thyroid hormones in cell-cell signaling. *Integr Comp Biol.*  
461 2009;49(2):155-66. doi:10.1093/icb/icp053.
- 462 28. Li Y, Park JS, Deng JH, Bai Y. Cytochrome c oxidase subunit IV is essential for assembly and respiratory  
463 function of the enzyme complex. *J Bioenerg Biomembr.* 2006;38(5-6):283-91. doi:10.1007/s10863-006-9052-  
464 z.
- 465 29. Lee J, Rhee K-J, Kim SH, Kang YW, Cho Y, Yang S-J et al. O6-Methylguanine-DNA methyltransferase  
466 (MGMT) gene expression is associated with ultraviolet B (UVB)-induced cell growth inhibition and recovery.  
467 *Genes & Genomics.* 2015;37(9):789-96. doi:10.1007/s13258-015-0308-z.
- 468 30. Bancroft BA, Baker NJ, Blaustein AR. Effects of UVB radiation on marine and freshwater organisms: a  
469 synthesis through meta-analysis. *Ecol Lett.* 2007;10(4):332-45. doi:10.1111/j.1461-0248.2007.01022.x.
- 470 31. Olson MH, Barbieri NE. Mechanisms of ultraviolet radiation tolerance in the freshwater snail *Physa acuta*.  
471 *Freshwater Science.* 2014;33(1):66-72. doi:10.1086/674341.
- 472 32. Zapata F, Wilson NG, Howison M, Andrade SC, Jorger KM, Schrod M et al. Phylogenomic analyses of  
473 deep gastropod relationships reject Orthogastropoda. *Proc Biol Sci.* 2014;281(1794):20141739.  
474 doi:10.1098/rspb.2014.1739.
- 475 33. Feldmeyer B, Wheat CW, Krezdorn N, Rotter B, Pfenninger M. Short read Illumina data for the de novo  
476 assembly of a non-model snail species transcriptome (*Radix balthica*, Basommatophora, Pulmonata), and a  
477 comparison of assembler performance. *BMC Genomics.* 2011;12:317. doi:10.1186/1471-2164-12-317.
- 478 34. Andrews S. FastQC. <http://www.bioinformatics.babraham.ac.uk/projects/fastqc/>. Accessed 08 July 2016.
- 479 35. Bolger AM, Lohse M, Usadel B. Trimmomatic: a flexible trimmer for Illumina sequence data.  
480 *Bioinformatics.* 2014;30(15):2114-20. doi:10.1093/bioinformatics/btu170.
- 481 36. Grabherr MG, Haas BJ, Yassour M, Levin JZ, Thompson DA, Amit I et al. Full-length transcriptome  
482 assembly from RNA-Seq data without a reference genome. *Nat Biotechnol.* 2011;29(7):644-52.  
483 doi:10.1038/nbt.1883.
- 484 37. Chang Z, Li G, Liu J, Zhang Y, Ashby C, Liu D et al. Bridger: a new framework for de novo transcriptome  
485 assembly using RNA-seq data. *Genome Biol.* 2015;16(1):30. doi:10.1186/s13059-015-0596-2.
- 486 38. Chevreaux B, Wetter T, Suhai S. Genome Sequence Assembly Using Trace Signals and Additional Sequence  
487 Information *Computer Science and Biology: Proceedings of the German Conference on Bioinformatics*  
488 (GCB)1999. p. 45-56.

- 489 39. Zhao L, Zhang N, Ma PF, Liu Q, Li DZ, Guo ZH. Phylogenomic analyses of nuclear genes reveal the  
490 evolutionary relationships within the BEP clade and the evidence of positive selection in Poaceae. *PLoS One*.  
491 2013;8(5):e64642. doi:10.1371/journal.pone.0064642.
- 492 40. Min XJ, Butler G, Storms R, Tsang A. OrfPredictor: predicting protein-coding regions in EST-derived  
493 sequences. *Nucleic Acids Res*. 2005;33:W677-80. doi:10.1093/nar/gki394.
- 494 41. Emms DM, Kelly S. OrthoFinder: solving fundamental biases in whole genome comparisons dramatically  
495 improves orthogroup inference accuracy. *Genome Biol*. 2015;16:157. doi:10.1186/s13059-015-0721-2.
- 496 42. Katoh K, Standley DM. MAFFT multiple sequence alignment software version 7: improvements in  
497 performance and usability. *Mol Biol Evol*. 2013;30(4):772-80. doi:10.1093/molbev/mst010.
- 498 43. Abascal F, Zardoya R, Telford MJ. TranslatorX: multiple alignment of nucleotide sequences guided by  
499 amino acid translations. *Nucleic Acids Res*. 2010;38(Web Server issue):W7-13. doi:10.1093/nar/gkq291.
- 500 44. Talavera G, Castresana J. Improvement of phylogenies after removing divergent and ambiguously aligned  
501 blocks from protein sequence alignments. *Syst Biol*. 2007;56(4):564-77. doi:10.1080/10635150701472164.
- 502 45. Capella-Gutierrez S, Silla-Martinez JM, Gabaldon T. trimAl: a tool for automated alignment trimming in  
503 large-scale phylogenetic analyses. *Bioinformatics*. 2009;25(15):1972-3. doi:10.1093/bioinformatics/btp348.
- 504 46. Misof B, Meyer B, von Reumont BM, Kuck P, Misof K, Meusemann K. Selecting informative subsets of  
505 sparse supermatrices increases the chance to find correct trees. *BMC Bioinformatics*. 2013;14:348.  
506 doi:10.1186/1471-2105-14-348.
- 507 47. Lanfear R, Calcott B, Ho SY, Guindon S. Partitionfinder: combined selection of partitioning schemes and  
508 substitution models for phylogenetic analyses. *Mol Biol Evol*. 2012;29(6):1695-701.  
509 doi:10.1093/molbev/mss020.
- 510 48. Lanfear R, Calcott B, Kainer D, Mayer C, Stamatakis A. Selecting optimal partitioning schemes for  
511 phylogenomic datasets. *BMC Evol Biol*. 2014;14:82. doi:10.1186/1471-2148-14-82.
- 512 49. Stamatakis A. RAXML-VI-HPC: maximum likelihood-based phylogenetic analyses with thousands of taxa  
513 and mixed models. *Bioinformatics*. 2006;22(21):2688-90. doi:10.1093/bioinformatics/btl446.
- 514 50. Ronquist F, Teslenko M, van der Mark P, Ayres DL, Darling A, Hohna S et al. MrBayes 3.2: efficient  
515 Bayesian phylogenetic inference and model choice across a large model space. *Syst Biol*. 2012;61(3):539-42.  
516 doi:10.1093/sysbio/sys029.
- 517 51. Rambaut A, Suchard MA, Xie D, Drummond AJ. Tracer v1.6. 2014.
- 518 52. Yang Z. PAML 4: phylogenetic analysis by maximum likelihood. *Mol Biol Evol*. 2007;24(8):1586-91.  
519 doi:10.1093/molbev/msm088.
- 520 53. Yang ZH, Nielsen R, Goldman N, Pedersen AMK. Codon-substitution models for heterogeneous selection  
521 pressure at amino acid sites. *Genetics*. 2000;155(1):431-49.

- 522 54. Zhang J, Nielsen R, Yang Z. Evaluation of an improved branch-site likelihood method for detecting  
523 positive selection at the molecular level. *Mol Biol Evol.* 2005;22(12):2472-9. doi:10.1093/molbev/msi237.
- 524 55. Benjamini Y, Hochberg Y. Controlling the False Discovery Rate - a Practical and Powerful Approach to  
525 Multiple Testing. *Journal of the Royal Statistical Society Series B-Methodological.* 1995;57(1):289-300.
- 526 56. Altschul SF, Madden TL, Schaffer AA, Zhang J, Zhang Z, Miller W et al. Gapped BLAST and PSI-BLAST: a  
527 new generation of protein database search programs. *Nucleic Acids Res.* 1997;25(17):3389-402.
- 528 57. Gotz S, Garcia-Gomez JM, Terol J, Williams TD, Nagaraj SH, Nueda MJ et al. High-throughput functional  
529 annotation and data mining with the Blast2GO suite. *Nucleic Acids Res.* 2008;36(10):3420-35.  
530 doi:10.1093/nar/gkn176.
- 531 58. Mitchell A, Chang HY, Daugherty L, Fraser M, Hunter S, Lopez R et al. The InterPro protein families  
532 database: the classification resource after 15 years. *Nucleic Acids Res.* 2015;43(Database issue):D213-21.  
533 doi:10.1093/nar/gku1243.
- 534 59. Jones P, Binns D, Chang HY, Fraser M, Li W, McAnulla C et al. InterProScan 5: genome-scale protein  
535 function classification. *Bioinformatics.* 2014;30(9):1236-40. doi:10.1093/bioinformatics/btu031.
- 536 60. Moriya Y, Itoh M, Okuda S, Yoshizawa AC, Kanehisa M. KAAS: an automatic genome annotation and  
537 pathway reconstruction server. *Nucleic Acids Res.* 2007;35(Web Server issue):W182-5.  
538 doi:10.1093/nar/gkm321.
- 539

540 **Tables titles and legends**

541 Table 1. Descriptive statistics of the assembled transcriptomes. *De novo* assemblies of new panpulmonate transcriptomes are highlighted in  
 542 bold.

| Clade                  | Species                              | Habitat            | Accession Number (SRA database) | Number of raw reads | Trimmed reads   |                 | MIRA meta-assembly |                        |             | BlastX          |              |              |
|------------------------|--------------------------------------|--------------------|---------------------------------|---------------------|-----------------|-----------------|--------------------|------------------------|-------------|-----------------|--------------|--------------|
|                        |                                      |                    |                                 |                     | For Trinity     | For Bridger     | All transcripts    | Transcripts > 300 (bp) | N50 (bp)    | Predicted ORF's | Single hits  | Single gene  |
| Acochlidia             | <i>Microhedyle glandulifera</i>      | Marine             | SRR1505118                      | 6194970             | 6103287         | 6028350         | 129453             | 84468                  | 742         | 83983           | 28750        | 12772        |
| Acochlidia             | <i>Strubellia wawrai</i>             | Freshwater         | SRR1505137                      | 24132673            | 24049385        | 23436737        | 82681              | 79947                  | 1582        | 79735           | 27911        | 13735        |
| Amphiboioidea          | <i>Phallomedusa solida</i>           | Intertidal         | SRR1505127                      | 25685273            | 25496722        | 24822510        | 68633              | 65500                  | 1424        | 64978           | 24560        | 12722        |
| <b>Ellobioidea</b>     | <b><i>Carychium sp.</i></b>          | <b>Terrestrial</b> | <b>XXXXXXXXXX</b>               | <b>33608344</b>     | <b>23461211</b> | <b>23461211</b> | <b>87994</b>       | <b>87719</b>           | <b>2035</b> | <b>87242</b>    | <b>23586</b> | <b>11672</b> |
| <b>Ellobioidea</b>     | <b><i>Cassidula plecotremata</i></b> | <b>Intertidal</b>  | <b>XXXXXXXXXX</b>               | <b>26316221</b>     | <b>18928297</b> | <b>17989294</b> | <b>62318</b>       | <b>62031</b>           | <b>1533</b> | <b>61569</b>    | <b>9583</b>  | <b>5717</b>  |
| <b>Ellobioidea</b>     | <b><i>Melampus flavus</i></b>        | <b>Intertidal</b>  | <b>SRR4103303</b>               | <b>21068142</b>     | <b>16919851</b> | <b>16052613</b> | <b>97629</b>       | <b>97334</b>           | <b>1640</b> | <b>96816</b>    | <b>22187</b> | <b>10778</b> |
| Ellobioidea            | <i>Ophicardelus sulcatus</i>         | Intertidal         | SRR1505124                      | 16026272            | 15737826        | 15425623        | 74467              | 71073                  | 1499        | 70573           | 20851        | 10937        |
| <b>Ellobioidea</b>     | <b><i>Pythia pachyodon</i></b>       | <b>Terrestrial</b> | <b>XXXXXXXXXX</b>               | <b>24016251</b>     | <b>20555474</b> | <b>19399330</b> | <b>92548</b>       | <b>92264</b>           | <b>2035</b> | <b>91759</b>    | <b>24077</b> | <b>11776</b> |
| <b>Ellobioidea</b>     | <b><i>Trimusculus sp.</i></b>        | <b>Intertidal</b>  | <b>SRR4102394</b>               | <b>25613160</b>     | <b>16343735</b> | <b>15696090</b> | <b>55728</b>       | <b>55391</b>           | <b>1240</b> | <b>55213</b>    | <b>9310</b>  | <b>5547</b>  |
| Hygrophila             | <i>Planorbarius corneus</i>          | Freshwater         | SRR1185333                      | 28040804            | 27417761        | 26569686        | 86067              | 82815                  | 2587        | 78934           | 39051        | 16959        |
| Hygrophila             | <i>Biomphalaria glabrata</i>         | Freshwater         | SRR942795                       | 172317158           | 170810180       | 164139487       | 70439              | 67493                  | 2070        | 66689           | 33757        | 17015        |
| Hygrophila             | <i>Radix balthica</i>                | Freshwater         | SRR097739                       | 16923850            | NA              | NA              | 54450              | 54450                  | 679         | 30883           | 14614        | 8140         |
| Pyramidelloidea        | <i>Turbonilla sp.</i>                | Marine             | SRR1505139                      | 26619896            | 26219791        | 25806515        | 132978             | 127301                 | 1023        | 126409          | 34180        | 14316        |
| <b>Stylommatophora</b> | <b><i>Arion vulgaris</i></b>         | <b>Terrestrial</b> | <b>XXXXXXXXXX</b>               | <b>24874185</b>     | <b>19179005</b> | <b>17977774</b> | <b>92316</b>       | <b>91984</b>           | <b>1454</b> | <b>91417</b>    | <b>29208</b> | <b>13134</b> |
| Systellommatophora     | <i>Onchidella floridana</i>          | Intertidal         | SRR1505123                      | 14872953            | 14797399        | 14528352        | 79502              | 74540                  | 1057        | 74146           | 28257        | 13679        |

543

544 Table 2. Examples of ortholog clusters under positive selection in the terrestrial and freshwater  
 545 lineages. The complete information can be found in the Additional Files 4 and 5.  
 546

| Orthologous cluster | BlastX annotation                                          | Molecular function                                             | Biological process                                                         | KEGG pathway                                            |
|---------------------|------------------------------------------------------------|----------------------------------------------------------------|----------------------------------------------------------------------------|---------------------------------------------------------|
| <b>Terrestrial</b>  |                                                            |                                                                |                                                                            |                                                         |
| OG0000060           | tyramine beta-hydroxylase-like                             | Copper ion binding, oxidoreductase activity                    | Oxidation-reduction process                                                | Tyrosine metabolism                                     |
| OG0000137           | sodium glucose cotransporter 4-like                        | Transmembrane transport                                        | Transporter activity                                                       | Carbohydrate digestion and absorption                   |
| OG0001172           | alpha-sarcomeric-like isoform X2                           | Actin filament binding, calcium ion binding                    | Actin crosslink formation, actin filament bundle assembly                  | Focal adhesion                                          |
| <b>Freshwater</b>   |                                                            |                                                                |                                                                            |                                                         |
| OG0000120           | cytochrome P450 3A7-like                                   | Monoxygenase activity, iron ion binding                        | Xenobiotic metabolic process                                               | Aminobenzoate degradation, steroid hormone biosynthesis |
| OG0004116           | methylated-DNA--cysteine methyltransferase-like isoform X2 | methylated-DNA-[protein]-cysteine S methyltransferase activity | DNA repair                                                                 | -                                                       |
| OG0004174           | cytochrome c oxidase subunit 4 isoform mitochondrial-like  | Cytochrome c oxidase activity                                  | Proton transport, mitochondrial electron transport, cytochrome c to oxygen | Oxidative phosphorylation                               |
| OG0002708           | 40S ribosomal protein S3a                                  | -                                                              | RNA binding, protein binding                                               | rRNA processing, translation                            |

547
